# Supplementary material for: Biophysical basis for Kv1.3 regulation of membrane potential changes induced by P2X4‐mediated calcium entry in microglia
Source: PubMed Central journal article supplement (PMC7540709; doi:10.1002/glia.23847), 2020-06-11

Figure S1.

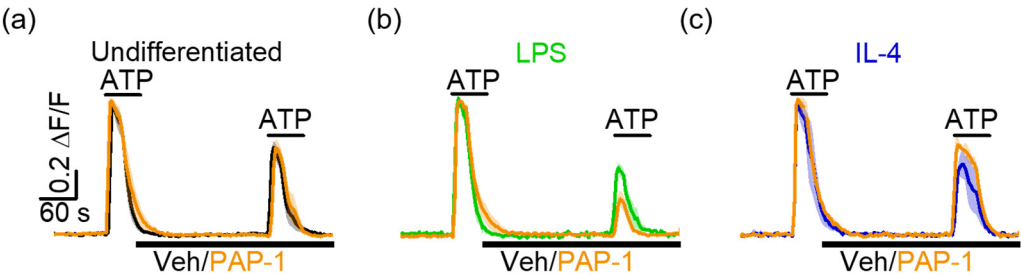

Figure S2.

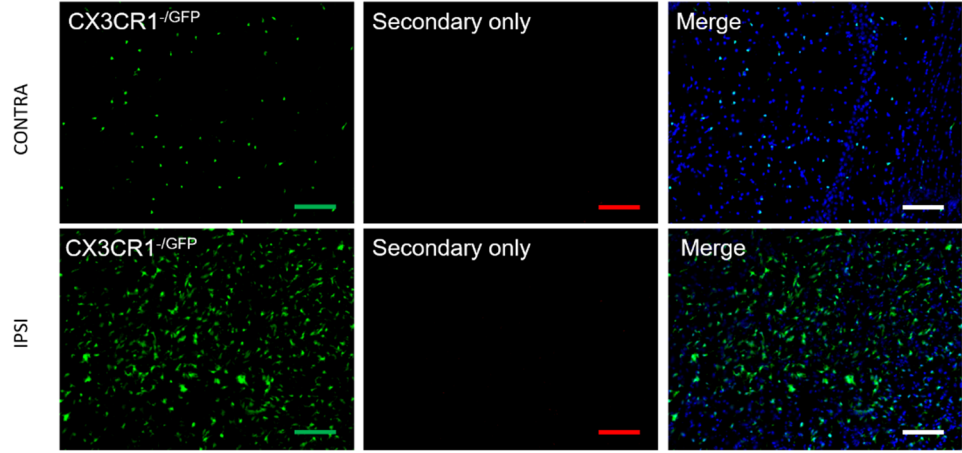

Figure S3.

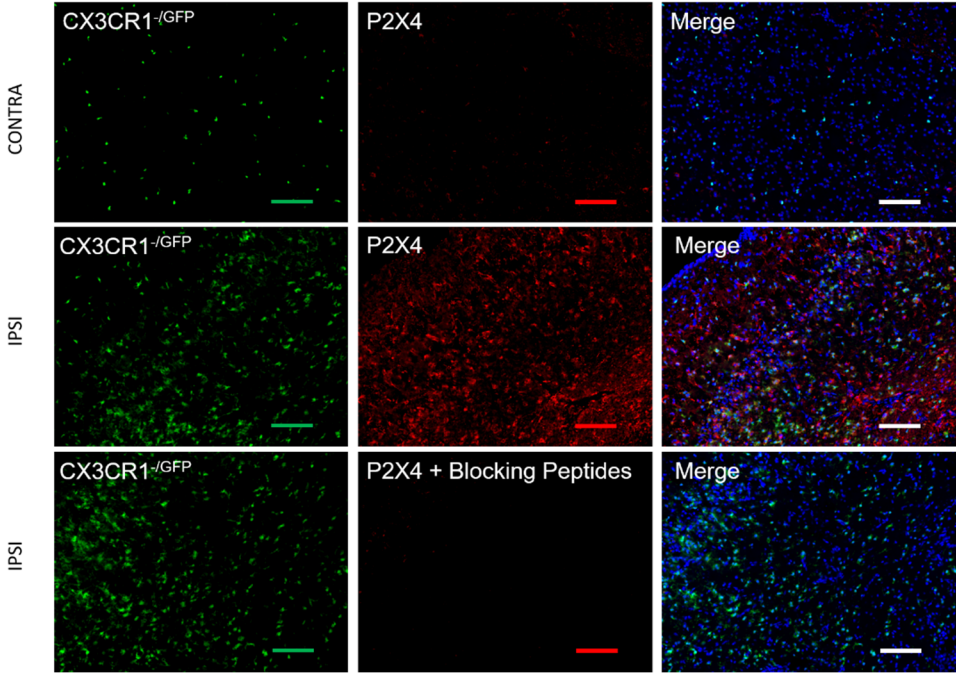

Figure S4.

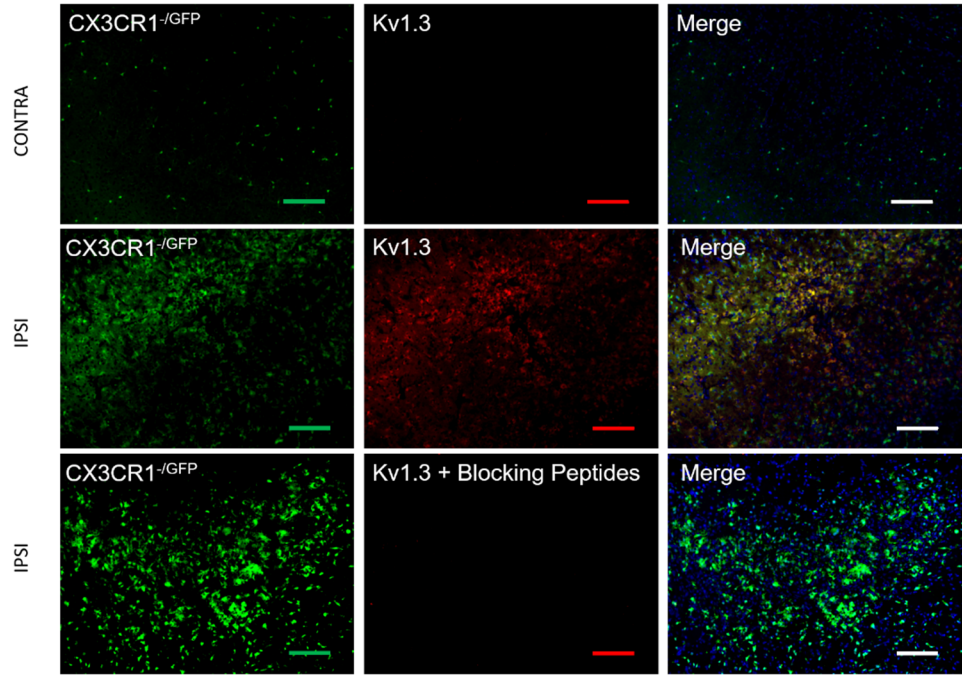

Supplement: GLIA-68-2377-s002.pdf [file GLIA-68-2377-s002.pdf]
